# Supplementary material
Source: publisher site journal article supplement (https://www.spandidos-publications.com/4222/downloadSupplementary)
Supplement: Supplementary file 1 [file downloadSupplementary]

## Sheet: sheet1
Table SII. Significant different genera between the MN group and healthy control group.
Taxon	H_Mean	H_Variance	H_Standard	MN_Mean	MN_Variance	MN_Standard	P_Value	Q_Value
Haemophilus	0.122	0.004	0.016	0.046	0.001	0.007	0.001	0.004
Alloprevotella	0.023	0	0.003	0.057	0.002	0.011	0.001	0.004
Campylobacter	0.018	0	0.002	0.007	0	0.001	0.001	0.004
Parvimonas	0.001	0	0	0.003	0	0	0.001	0.004
Abiotrophia	0	0	0	0.002	0	0	0.001	0.004
Peptococcus	0.001	0	0	0	0	0	0.001	0.004
Actinobacillus	0	0	0	0.001	0	0.001	0.001	0.004
Sphingobium	0	0	0	0	0	0	0.001	0.004
Fructobacillus	0	0	0	0	0	0	0.001	0.004
Hyphomicrobium	0	0	0	0	0	0	0.001	0.004
Synechococcus_CC9902	0	0	0	0	0	0	0.001	0.004
Bacillus	0	0	0	0	0	0	0.001	0.004
Sphingomonas	0	0	0	0	0	0	0.001	0.004
Pseudomonas	0	0	0	0	0	0	0.001	0.004
Staphylococcus	0	0	0	0	0	0	0.001	0.004
Brevundimonas	0	0	0	0	0	0	0.001	0.004
Coxiella	0	0	0	0	0	0	0.001	0.004
Gordonia	0	0	0	0	0	0	0.001	0.004
Candidatus_Methanomethylophilus	0	0	0	0	0	0	0.001	0.004
Cutibacterium	0	0	0	0	0	0	0.001	0.004
Christensenellaceae_R-7_group	0	0	0	0	0	0	0	0.004
Ralstonia	0	0	0	0	0	0	0.002	0.008
Family_XIII_UCG-001	0	0	0	0	0	0	0.004	0.014
Exiguobacterium	0	0	0	0	0	0	0.004	0.014
Glutamicibacter	0	0	0	0	0	0	0.004	0.014
Granulicatella	0.013	0	0.002	0.023	0	0.003	0.005	0.017
Methyloversatilis	0	0	0	0.001	0	0.001	0.006	0.018
Acinetobacter	0	0	0	0	0	0	0.006	0.018
Selenomonas_3	0.004	0	0.001	0.002	0	0	0.009	0.025
Pyramidobacter	0	0	0	0	0	0	0.009	0.025
Lautropia	0.013	0	0.003	0.004	0	0.001	0.01	0.027
Streptococcus	0.107	0.001	0.008	0.159	0.008	0.019	0.012	0.029
Prevotella	0.038	0	0.006	0.066	0.002	0.008	0.013	0.029
Fretibacterium	0.001	0	0	0	0	0	0.012	0.029
Kingella	0	0	0	0	0	0	0.012	0.029
Halomonas	0	0	0	0	0	0	0.011	0.029
Modestobacter	0	0	0	0	0	0	0.012	0.029
Prevotella_2	0.003	0	0	0.002	0	0	0.017	0.036
Erysipelotrichaceae_UCG-006	0	0	0	0	0	0	0.017	0.036
Fusobacterium	0.093	0.002	0.01	0.062	0.001	0.006	0.019	0.04
[Eubacterium]_yurii_group	0	0	0	0	0	0	0.022	0.044
Bacteroides	0	0	0	0	0	0	0.022	0.044
Sphaerochaeta	0	0	0	0	0	0	0.022	0.044
Leptotrichia	0.043	0.001	0.007	0.021	0.001	0.006	0.029	0.055
Prevotella_7	0.085	0.001	0.01	0.118	0.003	0.011	0.033	0.06
Mogibacterium	0	0	0	0	0	0	0.032	0.06
Catonella	0.004	0	0.001	0.002	0	0	0.034	0.061
Bosea	0	0	0	0	0	0	0.05	0.088
Dechloromonas	0	0	0	0	0	0	0.057	0.091
Aquabacterium	0	0	0	0	0	0	0.057	0.091
Moryella	0	0	0	0	0	0	0.057	0.091
Desulfobulbus	0	0	0	0	0	0	0.056	0.091
Marinobacterium	0	0	0	0	0	0	0.053	0.091
Caulobacter	0	0	0	0	0	0	0.067	0.105
Rothia	0.023	0	0.004	0.013	0	0.003	0.088	0.135
Veillonella	0.059	0.001	0.009	0.042	0	0.004	0.091	0.137
Prevotella_1	0.001	0	0.001	0.003	0	0.001	0.104	0.154
Oribacterium	0.006	0	0.002	0.003	0	0.001	0.11	0.159
Lactobacillus	0	0	0	0.001	0	0	0.111	0.159
Candidatus_Saccharimonas	0	0	0	0	0	0	0.122	0.172
Faucicola	0	0	0	0	0	0	0.133	0.183
Sneathia	0	0	0	0	0	0	0.134	0.183
Moraxella	0	0	0	0.003	0	0.002	0.139	0.186
Stomatobaculum	0.003	0	0.001	0.002	0	0.001	0.156	0.193
Solobacterium	0.001	0	0	0.002	0	0.001	0.166	0.193
Methylobacterium	0	0	0	0	0	0	0.163	0.193
Enhydrobacter	0	0	0	0	0	0	0.15	0.193
Corynebacterium_1	0	0	0	0	0	0	0.163	0.193
Peptoanaerobacter	0	0	0	0	0	0	0.151	0.193
Micrococcus	0	0	0	0	0	0	0.163	0.193
Gardnerella	0	0	0	0	0	0	0.165	0.193
Pedobacter	0	0	0	0	0	0	0.165	0.193
Sediminispirochaeta	0	0	0	0	0	0	0.152	0.193
Bergeyella	0.002	0	0	0.003	0	0.001	0.187	0.214
Megasphaera	0.003	0	0.001	0.002	0	0	0.195	0.22
Peptostreptococcus	0.001	0	0	0.001	0	0	0.218	0.24
Shuttleworthia	0	0	0	0	0	0	0.217	0.24
Alysiella	0	0	0	0	0	0	0.226	0.246
Aggregatibacter	0.014	0	0.002	0.01	0	0.002	0.234	0.249
Filifactor	0.003	0	0.001	0.002	0	0	0.238	0.249
Aeromonas	0	0	0	0	0	0	0.237	0.249
Mobiluncus	0	0	0	0	0	0	0.253	0.262
Bulleidia	0	0	0	0	0	0	0.262	0.268
Kribbella	0	0	0	0	0	0	0.272	0.275
Propionivibrio	0	0	0	0	0	0	0.279	0.279
Defluviitaleaceae_UCG-011	0.001	0	0	0	0	0	0.292	0.285
[Eubacterium]_saphenum_group	0.001	0	0	0	0	0	0.292	0.285
Porphyromonas	0.049	0.002	0.01	0.064	0.001	0.008	0.308	0.297
Atopobium	0.001	0	0	0.001	0	0	0.32	0.302
Selenomonas	0.001	0	0	0.001	0	0	0.319	0.302
Rikenellaceae_RC9_gut_group	0.001	0	0.001	0	0	0	0.358	0.334
Lachnoanaerobaculum	0.005	0	0.001	0.004	0	0.001	0.377	0.348
Anaeroglobus	0.001	0	0	0	0	0	0.394	0.36
Actinomyces	0.012	0	0.003	0.009	0	0.002	0.413	0.37
Phaselicystis	0	0	0	0	0	0	0.418	0.37
Eggerthia	0	0	0	0	0	0	0.416	0.37
Desulfomicrobium	0	0	0	0	0	0	0.442	0.387
Proteiniclasticum	0	0	0	0	0	0	0.456	0.395
Selenomonas_4	0	0	0	0	0	0	0.473	0.406
Prevotella_6	0.006	0	0.002	0.009	0	0.003	0.48	0.408
Wolinella	0	0	0	0	0	0	0.506	0.427
Gemella	0.014	0	0.002	0.016	0	0.003	0.521	0.435
Cardiobacterium	0.001	0	0	0.001	0	0	0.535	0.438
Johnsonella	0.001	0	0	0.001	0	0	0.529	0.438
Corynebacterium	0.002	0	0	0.003	0	0.001	0.546	0.443
Neisseria	0.156	0.006	0.019	0.141	0.007	0.018	0.587	0.468
[Eubacterium]_nodatum_group	0.002	0	0	0.001	0	0	0.593	0.468
Comamonas	0.001	0	0	0.001	0	0.001	0.59	0.468
Butyrivibrio_2	0	0	0	0.001	0	0.001	0.608	0.475
Streptobacillus	0	0	0	0	0	0	0.633	0.486
Desulfovibrio	0	0	0	0	0	0	0.633	0.486
[Eubacterium]_brachy_group	0	0	0	0	0	0	0.658	0.501
Dialister	0.001	0	0	0.001	0	0	0.673	0.503
Mycoplasma	0.001	0	0	0.001	0	0	0.67	0.503
Acholeplasma	0	0	0	0	0	0	0.735	0.544
Candidatus_Endomicrobium	0	0	0	0	0	0	0.741	0.544
Tannerella	0.002	0	0	0.002	0	0.001	0.811	0.577
Roseburia	0	0	0	0	0	0	0.812	0.577
Prevotellaceae_UCG-004	0	0	0	0	0	0	0.806	0.577
Alkaliflexus	0	0	0	0	0	0	0.793	0.577
Ezakiella	0	0	0	0	0	0	0.832	0.586
Scardovia	0	0	0	0	0	0	0.852	0.595
Odoribacter	0	0	0	0	0	0	0.897	0.622
Ruminococcaceae_UCG-014	0.003	0	0.001	0.004	0	0.002	0.912	0.627
F0058	0.001	0	0	0.001	0	0	0.926	0.632
Capnocytophaga	0.007	0	0.001	0.007	0	0.002	0.939	0.635
Treponema_2	0.014	0	0.003	0.014	0	0.002	0.996	0.646
F0332	0	0	0	0	0	0	0.989	0.646
Phocaeicola	0	0	0	0	0	0	0.994	0.646
Burkholderia-Caballeronia-Paraburkholderia	0	0	0	0	0	0	0.977	0.646
RB41	0	0	0	0	0	0	0.994	0.646
Olsenella	0	0	0	0	0	0	1	0.646
